# Supplementary material for: ConTra v3: a tool to identify transcription factor binding sites across species, update 2017
Source: PubMed Central journal article supplement — Nucleic Acids Res. 2017 May 4;45(Web Server issue):W490–4. doi: 10.1093/nar/gkx376 (PMC5570180; doi:10.1093/nar/gkx376), 2017-05-04

# ConTra v3: a tool to identify transcription factor

binding sites across species, update 2017

## Supplemental Material

Łukasz Kreft<sup>1</sup>, Arne Soete<sup>2,4</sup>, Paco Hulpiau<sup>2,4</sup>, Alexander Botzki<sup>1</sup>, Yvan Saeys<sup>2,3</sup> and Pieter De Bleser<sup>2,4\*</sup>

<sup>1</sup>VIB Bioinformatics Core, Rijvischestraat 126 3R, 9052 Zwijnaarde-Ghent, Belgium

<sup>2</sup>VIB-UGent Center for Inflammation Research, Technologiepark 927, 9052 Zwijnaarde-Ghent, Belgium

<sup>3</sup>Department of Applied Mathematics, Computer Science and Statistics, Ghent University, Krijgslaan 281, S9, 9000 Gent, Belgium

<sup>4</sup>Department of Biomedical Molecular Biology, Ghent University, Technologiepark 927, 9052 Zwijnaarde-Ghent, Belgium

\*To whom correspondence should be addressed.

Address for correspondence:

Department of Biomedical Molecular Biology

VIB & Ghent University

Technologiepark 927, B-9052 Ghent, Belgium

Tel: +32.9.3313-693

Fax: +32.9.3313-609

E-mail: [pieterdb@irc.vib-ugent.be](mailto:pieterdb@irc.vib-ugent.be)

## **Contents**

**Supplemental Data S1:** Additional table and figure for the IL2 example further explaining the results of an exploration analysis.

**Supplemental Data S2:** Step-by-step case study of a ConTra v3 exploration analysis using the GABARAPL1 promoter.

**Supplemental Data S3:** Step-by-step case study of a ConTra v3 visualisation analysis of the intron of the human UBC gene.

## **Legends to supplemental data**

### **Supplemental Data S1**

The ConTra v3 exploration analysis on the human IL2 promoter region (500 bp upstream) retrieves a table of results shown in (A), by default filtered on a q-value  $\leq 0.25$  and information content (IC) of  $\geq 5$  bits. The last three columns show the position in the ranking of the three criteria regulatory potential or RP rank, ChIP-seq based hotspot or HS rank and strongest conservation score or CE rank. NF-AT (V\$NFAT\_Q4\_01) and ELF-1 (V\$ELF1\_Q6) are listed first and second in the table based on their q-value and IC. Both transcription factor binding sites are positioned in the top 10 of each ranking in (A). Octamer (V\$OCT\_Q6) is on position seven in the list with a very good HS rank of 8 but a bit lower ranked for RP (40) and CE (27). These three transcription factor matrices were selected for visualization also shown in Figure 1.

(B) The UCSC link on the visualization result page of ConTra v3 shows a view of the region of interest with the RefSeq track and ConTra v3 visualization track. Other tracks may be shown depending on the UCSC session of the user. For the view shown in (B) we have added a ConTra v3 exploration track of the same three predicted binding sites to illustrate the three criteria (RP, HS and CE). There are more NF-AT and ELF1 binding sites compared to OCT. Most of them are present both in highly conserved regions (100 vertebrates conservation track) and in hot spot regions (ReMapPublicENCODE track). Only two OCT sites are predicted indicated by the rectangle with orange background in (B). The second site is in a region with modest conservation explaining a lower CE rank for OCT. However both OCT sites are in a hot spot region based on the ReMapPublicENCODE track resulting in a very good HS rank of 8. A user interested in open chromatin regions can choose to show the UCSC track DNase I hypersensitivity clusters from ENCODE as shown in (B).

A user interested in a specific criterium can remove the default q-value and IC filter and choose to look e.g. only at the top 5 scoring RP hits (C), top 5 HS hits (D) or top 5 scoring CE hits (E) by setting the respective filter on  $\leq 5$ .

### **Supplemental Data S2**

Riz et al reported an evolutionary conserved Nrf2/NFE2L2 motif in the GABARAPL1 promoter coinciding with an NF-E2 ChIP-seq binding site from the ENCODE project. In the case study in Supplemental Data S2 we show how a user can conduct an exploratory in silico analysis in ConTra v3 and predict how the autophagy-related GABARAPL1 gene is regulated as such.

### **Supplemental Data S3**

Bianchi et al. reported that intron removal resulted in a marked reduction of Ubc promoter activity. Using electrophoretic mobility shift assays the authors demonstrated that Sp1 and Sp3 transcription factors can interact with several sites in the UBC intron. The case study in Supplemental Data S3 of the human UBC intron uses ConTra v3 to identify and visualize these Sp1 binding sites.

# Supplemental Data S1

## A

| Filter                              | Matrix ID     | TF      | PWM db           | p-value    | q-value   | IC     | Consensus             | RP rank | HS rank | CE rank |
|-------------------------------------|---------------|---------|------------------|------------|-----------|--------|-----------------------|---------|---------|---------|
| Select                              |               |         |                  | <=         | <= 0.25   | >= 5   |                       | <=      | <=      | <=      |
| <input checked="" type="checkbox"/> | V\$NFAT_Q4_01 | NF-AT   | TRANSFAC20113    | 3.87334e-6 | 0.0014654 | 6.23   | GWGGAAAMWY            | 6       | 1       | 6       |
| <input checked="" type="checkbox"/> | V\$ELF1_Q6    | EIF-1   | TRANSFAC20113    | 2.40848e-5 | 0.0022780 | 7.236  | RDWASAGGAARW          | 3       | 9       | 5       |
| <input type="checkbox"/>            | MA0398.1      | SUM1    | JASPAR_CORE_2016 | 3.13096e-4 | 0.0169217 | 6.198  | AWWATTTWT             | 5       | 52      | 4       |
| <input type="checkbox"/>            | MA0378.1      | SFP1    | JASPAR_CORE_2016 | 5.29349e-4 | 0.0250332 | 8.663  | WYWRDRAAAAWTTTTYYWYKG | 2       | 414     | 2       |
| <input type="checkbox"/>            | MA0294.1      | EDS1    | JASPAR_CORE_2016 | 0.0032594  | 0.0948557 | 7.498  | CGGAAAAAT             | 44      | 5       | 42      |
| <input type="checkbox"/>            | MA0804.1      | TBX19   | JASPAR_CORE_2016 | 0.0025317  | 0.0948557 | 12.116 | WITMRCACCTAGGTGYGAAA  | 24      | 30      | 10      |
| <input checked="" type="checkbox"/> | V\$OCT_Q6     | Octamer | TRANSFAC20113    | 0.0030462  | 0.0948557 | 6.453  | TDATTTGCATW           | 40      | 8       | 27      |
| <input type="checkbox"/>            | MA0390.1      | STB3    | JASPAR_CORE_2016 | 0.0037323  | 0.0956778 | 11.039 | GTYAAAWTTTTTCACTYHKK  | 41      | 6       | 43      |
| <input type="checkbox"/>            | MA0685.1      | SP4     | JASPAR_CORE_2016 | 0.0037935  | 0.0956778 | 13.827 | YWRGCCACGCCMCTYY      | 32      | 14      | 24      |

## B

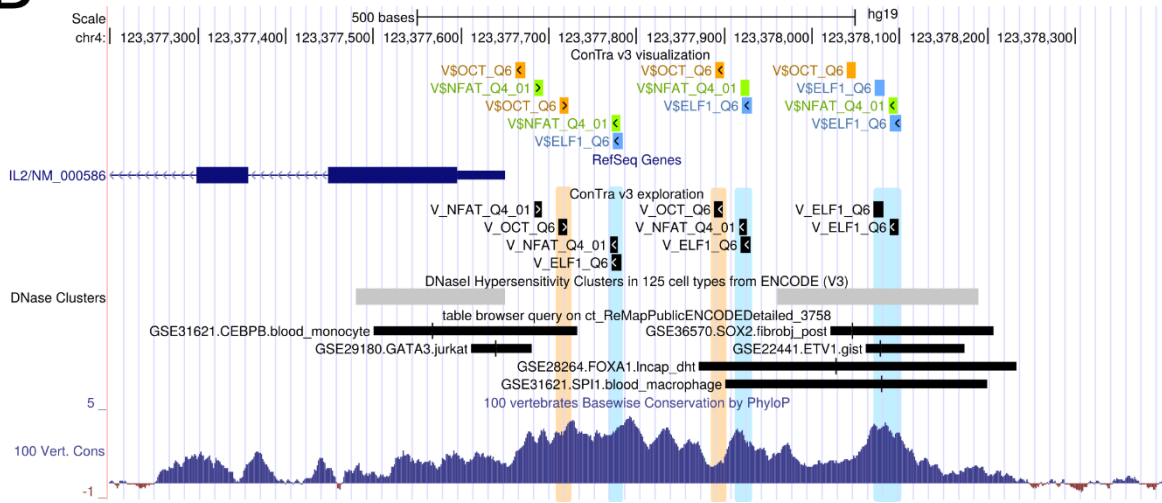

# C

| Matrix ID  | TF    | PWM db           | p-value<br>≤ | q-value<br>≤ | IC<br>≥ | Consensus            | RP rank<br>≤ 5 | HS rank<br>≤ | CE rank<br>≤ |
|------------|-------|------------------|--------------|--------------|---------|----------------------|----------------|--------------|--------------|
| F\$SFP1_01 | SFP1  | TRANSFAC20113    | 8.33776e-6   | 0.0015772    | 3.128   | NNNNNAAAAAATTTNNNNNN | 1              | 62           | 1            |
| V\$ELF1_Q6 | EIF-1 | TRANSFAC20113    | 2.40848e-5   | 0.0022780    | 7.236   | RDWASAGGAARW         | 3              | 9            | 5            |
| F\$SUM1_02 | SUM1  | TRANSFAC20113    | 1.10558e-4   | 0.0069711    | 2.815   | AAAATTTT             | 4              | 36           | 3            |
| MA0398.1   | SUM1  | JASPAR_CORE_2016 | 3.13096e-4   | 0.0169217    | 6.198   | AWWATTTWT            | 5              | 52           | 4            |
| MA0378.1   | SFP1  | JASPAR_CORE_2016 | 5.29349e-4   | 0.0250332    | 8.663   | WYWRDRAAAWTTTTYYWYKG | 2              | 414          | 2            |

# D

| Matrix ID     | TF     | PWM db           | p-value<br>≤ | q-value<br>≤ | IC<br>≥ | Consensus  | RP rank<br>≤ | HS rank<br>≤ 5 | CE rank<br>≤ |
|---------------|--------|------------------|--------------|--------------|---------|------------|--------------|----------------|--------------|
| V\$NFAT_Q4_01 | NF-AT  | TRANSFAC20113    | 3.87334e-6   | 0.0014654    | 6.23    | GWGGAAAMWY | 6            | 1              | 6            |
| M6365_1.02    | NFATC4 | Homo_sapiens     | 1.87355e-5   | 0.0022780    | 1.877   | NNNTTTCN   | 8            | 2              | 7            |
| M6363_1.02    | NFATC2 | Homo_sapiens     | 3.22389e-5   | 0.0024393    | 2.189   | NNTTTCCA   | 7            | 3              | 8            |
| M6364_1.02    | NFATC3 | Homo_sapiens     | 0.0024786    | 0.0948557    | 2.502   | ANTTTTCCA  | 43           | 4              | 41           |
| MA0294.1      | EDS1   | JASPAR_CORE_2016 | 0.0032594    | 0.0948557    | 7.498   | CGGAAAAAT  | 44           | 5              | 42           |

# E

| Matrix ID  | TF    | PWM db           | p-value<br>≤ | q-value<br>≤ | IC<br>≥ | Consensus            | RP rank<br>≤ | HS rank<br>≤ | CE rank<br>≤ 5 |
|------------|-------|------------------|--------------|--------------|---------|----------------------|--------------|--------------|----------------|
| F\$SFP1_01 | SFP1  | TRANSFAC20113    | 8.33776e-6   | 0.0015772    | 3.128   | NNNNNAAAAAATTTNNNNNN | 1            | 62           | 1              |
| V\$ELF1_Q6 | EIF-1 | TRANSFAC20113    | 2.40848e-5   | 0.0022780    | 7.236   | RDWASAGGAARW         | 3            | 9            | 5              |
| F\$SUM1_02 | SUM1  | TRANSFAC20113    | 1.10558e-4   | 0.0069711    | 2.815   | AAAATTTT             | 4            | 36           | 3              |
| MA0398.1   | SUM1  | JASPAR_CORE_2016 | 3.13096e-4   | 0.0169217    | 6.198   | AWWATTTWT            | 5            | 52           | 4              |
| MA0378.1   | SFP1  | JASPAR_CORE_2016 | 5.29349e-4   | 0.0250332    | 8.663   | WYWRDRAAAWTTTTYYWYKG | 2            | 414          | 2              |

## Supplemental Data S2

**Step 1:** Choose Exploration as Type of analysis and type the GABARAPL1 gene as input.

Step 1 / Step 2 / Step 3 / Step 4 / Run

Type of analysis ?

**Visualization:** Identify binding sites for 1 or several transcription factors (TFs) in the cross-species alignment of my promoter(s).

**Exploration:** Identify which transcription factors (TFs) can regulate my gene(s)/transcript(s).

Reference organism, gene / transcript ?

Organism: multiple alignments of 99 vertebrate genomes to the Human (Homo Sapiens) [more info](#)

Gene or transcript: GABARAPL1

Additional settings

I want to receive results in my mailbox

SAMPLE NEXT

**Step 2:** There is one RefSeq transcript NM\_031412 (default selection) and two Ensembl transcripts for the GABARAPL1 gene. Click Next.

Step 1 / Step 2 / Step 3 / Step 4 / Run

Select which transcript ConTra should use

Gene GABARAPL1 : GABA(A) receptor-associated protein like 1

Aliases: APG8-LIKE, APG8L, ATG8, ATG8B, ATG8L, GEC1

|                                  |                    |                      |                 |         |
|----------------------------------|--------------------|----------------------|-----------------|---------|
| <input checked="" type="radio"/> | TSS chr12:10365488 | Number of introns: 3 | NM_031412       | RefSeq  |
| <input type="radio"/>            | TSS chr12:10365488 | Number of introns: 3 | ENST00000266458 | Ensembl |
| <input type="radio"/>            | TSS chr12:10365531 | Number of introns: 2 | ENST00000421801 | Ensembl |

Showing 1 out of 1 results

NEXT

**Step 3:** Select Promoter and enter 1000 upstream region. Click Next.

Step 1 / Step 2 / **Step 3** / Step 4 / Run

Select the sequence parts you are interested in

Promoter

Gene

Upstream region

NEXT

**Step 4** to set the stringency and choose the transcription factor binding sites is **skipped in exploration mode**. Before starting the analysis, a user can review the input parameters by clicking on the relevant step in the breadcrumb. Clicking the Run button will submit the job in the server queue and look for all motifs in the database in the region of interest.

Step 1 / Step 2 / Step 3 / Step 4 / **Run**

|                     |                                                           |
|---------------------|-----------------------------------------------------------|
| Type of analysis:   | exploration                                               |
| Reference organism: | Human ( <i>Homo sapiens</i> )                             |
| Transcript:         | GABARAPL1 chr12:10365488, number of Introns: 3, NM_031412 |
| Sequence parts:     | promoter, upstream 1000bp                                 |
| Motif database:     | _all_                                                     |
| Email address:      | none specified                                            |

RUN

|                     |                                                           |
|---------------------|-----------------------------------------------------------|
| Type of analysis:   | exploration                                               |
| Reference organism: | Human ( <i>Homo sapiens</i> )                             |
| Transcript:         | GABARAPL1 chr12:10365488, number of Introns: 3, NM_031412 |
| Sequence parts:     | promoter, upstream 1000bp                                 |
| Motif database:     | _all_                                                     |
| Email address:      | none specified                                            |

The job has been submitted in Contra v3 queue.  
It is scheduled to be executed soon.  
As soon as the results will be available you will be redirected to the results page.

Job ID **aac37ee081d29ddcc429762322da9311**  
Submitted on **Wednesday 2017-04-05 14:40:25**  
Elapsed time 0 hours 0 minutes 13 seconds

You can bookmark (CTRL + D) this page and return later:  
<http://bliot2.lrc.ugent.be/contra/v3/#/results/aac37ee081d29ddcc429762322da9311>



**Results:** The exploration results page shows a table with the top hits filtered by q-value  $\leq 0.25$  and information content (IC)  $\geq 5$  which gives the users an initial idea about putative regulators. For a longer list users can choose to change or remove the filters and/or search for specific transcription factors (TF) in the (preferably unfiltered) list.

Type of analysis: **exploration**

Reference organism: **Human (*Homo sapiens*)**

Transcript: **GABARAPL1 chr12:10365488, number of introns: 3, NM\_031412**

Sequence parts: promoter, upstream 1000bp

Motif database: **\_all\_**

Email address: **none specified**

RE-RUN

Below you can find the results. You can also [download zip package](#).

| Filter                   | Matrix ID        | TF         | PWM db           | p-value    | q-value   | IC    | Consensus | RP rank | HS rank | CE r |
|--------------------------|------------------|------------|------------------|------------|-----------|-------|-----------|---------|---------|------|
| Select                   |                  |            |                  | <=         | <= 0.25   | >= 5  |           | <=      | <=      | <=   |
| <input type="checkbox"/> | V\$ATF6_01       | ATF6       | TRANSFAC20113    | 7.45040e-4 | 0.0308757 | 8.997 | TGACGTGG  | 1       | 24      | 3    |
| <input type="checkbox"/> | V\$CREBP1CJUN_01 | ATF2:c-Jun | TRANSFAC20113    | 0.0027338  | 0.0377650 | 8.641 | TGACGYA   | 2       | 25      | 4    |
| <input type="checkbox"/> | MA0967.1         | BZIP60     | JASPAR_CORE_2016 | 0.0058484  | 0.0484737 | 6.893 | TGACGTCA  | 3       | 26      | 5    |
| <input type="checkbox"/> | MA0018.2         | CREB1      | JASPAR_CORE_2016 | 0.0101197  | 0.0698965 | 5.547 | TGACGYCA  | 4       | 27      | 6    |
| <input type="checkbox"/> | V\$CREB_01       | CREB       | TRANSFAC20113    | 0.0155379  | 0.0919882 | 7.787 | TGACGTMA  | 5       | 28      | 7    |

We advise users also to look at the individual ranked product analysis. This can be done by filtering on either regulatory potential (RP rank), ChIP-seq based hotspot (HS rank) or strongest conservation i.e. conserved element score (CE rank). Below the top 5 “ChIP-seq based” hotspot results (HS rank). Specific binding sites can be switched on to select them and run visualization.

| Filter                              | Matrix ID  | TF     | PWM db           | p-value   | q-value   | IC     | Consensus    | RP rank | HS rank | CE rank |
|-------------------------------------|------------|--------|------------------|-----------|-----------|--------|--------------|---------|---------|---------|
| Select                              |            |        |                  | <=        | <=        | >=     |              | <=      | <= 5    | <=      |
| <input checked="" type="checkbox"/> | M6360_1.02 | NFE2L2 | Homo_sapiens     | 0.1484510 | 0.3307306 | 3.128  | NNTGACTCAGCA | 106     | 2       | 60      |
| <input type="checkbox"/>            | MA0477.1   | FOSL1  | JASPAR_CORE_2016 | 0.0810083 | 0.3307306 | 9.888  | RRTGASTCAKS  | 98      | 1       | 59      |
| <input type="checkbox"/>            | MA0491.1   | JUND   | JASPAR_CORE_2016 | 0.2307033 | 0.3307306 | 10.207 | DRTGASTCATS  | 99      | 4       | 62      |
| <input type="checkbox"/>            | V\$ATF4_Q2 | ATF4   | TRANSFAC20113    | 0.1991089 | 0.3307306 | 6.609  | SVTGACKYMRBG | 107     | 3       | 61      |
| <input type="checkbox"/>            | V\$FRA1_Q5 | FRA1   | TRANSFAC20113    | 0.2579822 | 0.3307306 | 6.777  | TGAGTCAK     | 93      | 5       | 63      |

Select the stringency core = 0.95, similarity matrix = 0.85

RUN VISUALIZATION

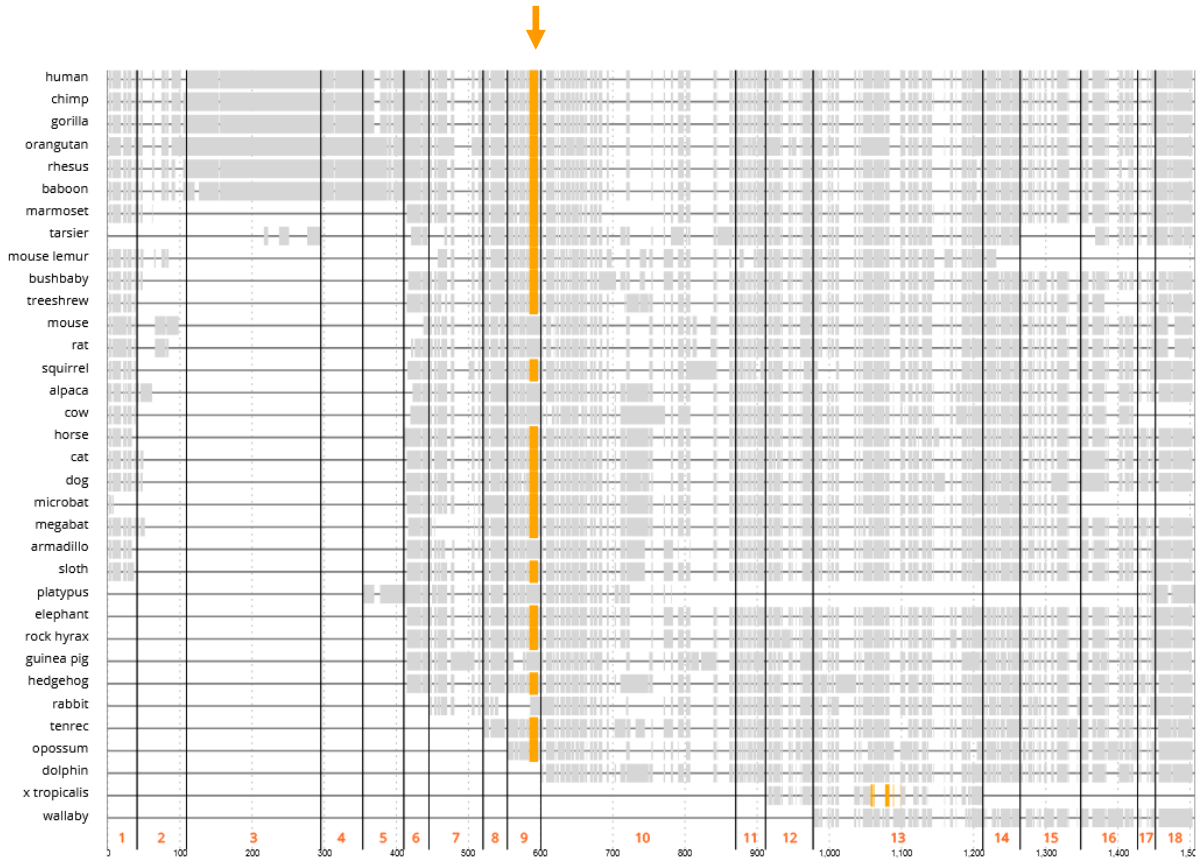

Selection of NFE2L2/NRF2 reveals the highly conserved site reported by Riz et al in the graphical visualization overview (figure above) and can be zoomed in (figure below left). Below the graphical overview users can see the conserved NFE2L2/NRF2 binding site at nucleotide level (below right).

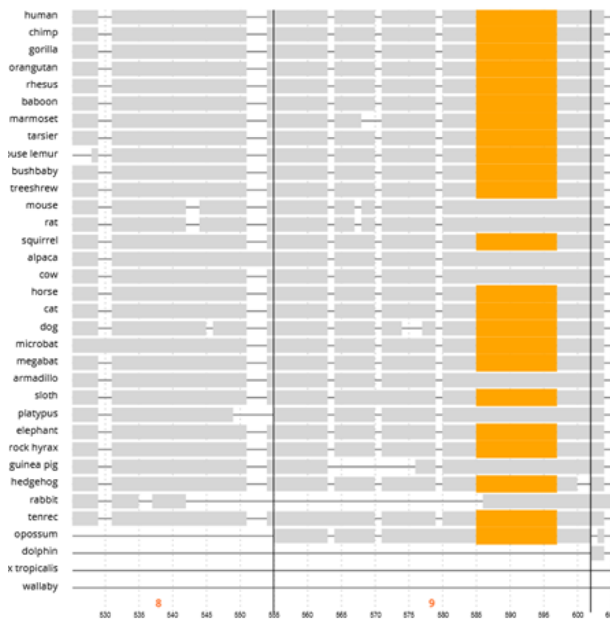

|              |                                                            |
|--------------|------------------------------------------------------------|
| human        | --GTCC TTCAT-CTGACT-CCTCTCTT-CAGATTCCTGAGTCACGCTCTGTT----  |
| chimp        | --GTCC TTCAT-CTGACT-CCTCTCTT-CAGATTCCTGAGTCACGCTCTGTT----  |
| gorilla      | --GTCC TTCAT-CTGACT-CCTCTCTT-CAGATTCCTGAGTCACGCTCTGTT----  |
| orangutan    | --GTCC TTCAT-CTGACT-CCTCTCTT-CAGATTCCTGAGTCACGCTCTGTT----  |
| rhesus       | --GTCC TTCAT-CTGACT-CCTCTCTT-CAGATTCCTGAGTCACGCTCTGTT----  |
| baboon       | --GTCC TTCAT-CTGACT-CCTCTCTT-CAGATTCCTGAGTCACGCTCTGTT----  |
| marmoset     | --GTCC TTCAT-CTGACT-CCTCTCTT-CAGATTCCTGAGTCACGCTCTGTT----  |
| tarsier      | --GTCC TTCAT-CTGACT-CCTCTCTT-CAGATTCCTGAGTCACGCTCTGTT----  |
| mouse lemur  | --GCCCTT CAC-CTTACA-CATCTCTT-CAAATTCCTGAGTCACGCTCTGTT----  |
| bushbaby     | --GCCCTT CAC-CTGACA-CGTCTCTT-CGAATTCCTGAGTCACGCTGTGCC----  |
| treeshrew    | --GCCCTT CAC-CTTACA-CATATTTT-AAAATTCCTGAGTCACGCTCCGCT----  |
| mouse        | --GCCCTT CAC-CTTAGG-CATCTCTT-CAAATTCCTGAGTCACGCTCTGTT----  |
| rat          | --GTCTTTCAC-CCT-TA-CACCTTCTT-CAAATCCATGAGTCATGCTCTGTT----  |
| squirrel     | --GTTCTT CAC-CCT-TA-CACCTTCTT-CAAATCCATGAGTCACGCTGTGTT---- |
| alpaca       | --GCCCTT TGC-TTTGCA-CACCCCTT-CAAATTCCTGAGTCACGCTCTGTT----  |
| cow          | ACGCCCTT CAG-CTTATA-CGTCTCAT-CAAATCCCTGAGTCATGCTCTGTT----  |
| horse        | --GCCCTT CAC-CGGCTA-CATCTCTT-CAGTCCCTGAGTCATGCTCTGTT----   |
| cat          | --GCCCTT CAC-CTTATA-CATCTCTT-CAAATTCCTGAGTCATGCTCTGTT----  |
| dog          | --GCCCTT CAC-CTTATA-CATCTCTT-CAAATTCCTGAGTCATGCTCTGTT----  |
| microbat     | --GCCCTT CAC-CTTCTA-CAT--CT-CAAATTCCTGAGTCATGCTCTGTT----   |
| megabat      | --GCCCTT CAC-CTAATA-CGTCTCTT-CGAATTCCTGAGTCACGATTTGTT----  |
| armadillo    | --ACCCTT CAC-CTAATA-TGCCTTTT-GGAATTCCTGAGTCACGCTTTTGT----  |
| sloth        | --ACCCTT CAT-CTTACG-CATCTCCT-CAGATGCCCTGAGTCACCTCTGTT----  |
| platypus     | --GCCCTT CAT-CGCAGGACATCTTCT-CAGATTCCTGAGTCACGCTGTGTT----  |
| elephant     | ---CCCTCAGT-CTTCCA-CGGAGCAG-AAGGTCCTT GAGTCACCCCGTGT----   |
| rock hyrax   | --GCCCTT CAT-ATTACA-GGTCTCTT-CAAATTCCTGAGTCATGCTCAGTT----  |
| guinea pig   | --GCCCTT CAC-CTTACA-TATCTCTT-CAAATTCCTGAGTCATGCTCTGTT----  |
| hedgehog     | --GCCCTT CAC-----CTT-CAAACGCCCTGAGTCACGCTCCGTT----         |
| rabbit       | --GCCCTG CAC-TTTAAA-CATCTCTT-CAAATTCCTGAGTCAGCTG--TT----   |
| tenrec       | -----CCGAGTCACGCCCTGCTGACC                                 |
| opossum      | --GCCCTT CACGCTTACA-CAGGCTCTT-CAAATTCCTGAGTCATGCTCTGTT---- |
| dolphin      | ---TCTTTCCC-CGTTCT-CTCCCTTCCAAAATTCCTGAGTCACGCTGTT-T----   |
| x.tropicalis | -----TT-----                                               |
| wallaby      | -----                                                      |

## Supplemental Data S3

**Step 1:** Choose Visualization as Type of analysis and enter the human UBC as reference organism and gene respectively.

Step 1 / Step 2 / Step 3 / Step 4 / Run

Type of analysis 

**Visualization:** Identify binding sites for 1 or several transcription factors (TFs) in the cross-species alignment of my promoter(s).

**Exploration:** Identify which transcription factors (TFs) can regulate my gene(s)/transcript(s).

Reference organism, gene / transcript 

Organism

Gene or transcript

Genomic position

**Step 2:** There is one reference transcript for the UBC gene. The default choice is the NCBI RefSeq NM\_021009. A user could also choose to use the Ensembl transcript ENST00000339647. Click Next. Tip: when a long list of transcripts is retrieved, clicking the orange arrow on the right of the transcript table will automatically jump to the Next button on the bottom of the page.

Step 1 / Step 2 / Step 3 / Step 4 / Run

Select which transcript ConTra should use

Gene UBC : ubiquitin C

Allases: HMG20

|                                  |                     |                      |                 |         |
|----------------------------------|---------------------|----------------------|-----------------|---------|
| <input checked="" type="radio"/> | TSS chr12:125399587 | Number of introns: 1 | NM_021009       | RefSeq  |
| <input type="radio"/>            | TSS chr12:125399577 | Number of introns: 1 | ENST00000339647 | Ensembl |



### Step 3: Select Intron 1 and click Next

Step 1 / Step 2 / **Step 3** / Step 4 / Run

Select the sequence parts you are interested in

- Promoter
- UTR5
- UTR3
- Intron 1

NEXT

**Step 4:** The default stringency of 0.95 core similarity and 0.85 matrix similarity is a good start for most analyses. A more experienced user could choose another stringency based on e.g. the quality of the matrix. Searching for the transcription factor Sp1 retrieves several matrices. We have selected the Transfac Sp1 matrix V\$SP1\_Q2\_01, indicating a high quality matrix of 2 (Q2) and the Transfac Sp1/Sp3 matrix V\$SP1SP3\_Q4.

Step 1 / Step 2 / Step 3 / **Step 4** / Run

Balance sensitivity and accuracy ▶

Select the stringency core = 0.95, similarity matrix = 0.85

Select for which transcription factors you want to see the predicted binding sites ▶

Here is the list of currently selected factors. Please select up to 20 factors. You can still select 18.

| Selected factors                    | Matrix ID    | TF name | Database      | Tax group | Description |
|-------------------------------------|--------------|---------|---------------|-----------|-------------|
| <input checked="" type="checkbox"/> | V\$SP1_Q2_01 | Sp1     | TRANSFAC20113 |           |             |
| <input checked="" type="checkbox"/> | V\$SP1SP3_Q4 | SP1:SP3 | TRANSFAC20113 |           |             |

Here is the list of factors from our database. You can easily search and select the factor you are interested in.

Search Sp1 ✕ Limit 25 ▶

| Add to analysis          | Matrix ID                    | TF name | Database      | Tax group | Description           |
|--------------------------|------------------------------|---------|---------------|-----------|-----------------------|
| <input type="checkbox"/> | M5627_1.02                   | MESP1   | Homo_sapiens  |           |                       |
| <input type="checkbox"/> | taipale-NNCACCTGNN-MESP1-DBD | MESP1   | taipale       |           |                       |
| <input type="checkbox"/> | M1906_1.02                   | SP1     | Homo_sapiens  |           |                       |
| <input type="checkbox"/> | V\$SP1_Q4_01                 | Sp1     | TRANSFAC20113 |           |                       |
| <input type="checkbox"/> | V\$SP1_01                    | Sp1     | TRANSFAC20113 |           | stimulating protein 1 |

**Run:** Before starting the analysis a user can review the input parameters. Input can still be modified by clicking on the relevant step in the breadcrumb with the previously chosen input filled in.

Clicking the Run button will submit the job in the queue on the server.

Step 1 / Step 2 / Step 3 / Step 4 / **Run**

Type of analysis: **visualization**  
 Reference organism: **Human (*Homo sapiens*)**  
 Transcript: **UBC chr12:125399587, number of introns: 1, NM\_021009**  
 Sequence parts: **Intron 1,**  
 Transcription factors: **Sp1 TRANSFAC20113,V\$SP1\_Q2\_01,M00933,  
 SP1:SP3 TRANSFAC20113,V\$SP1SP3\_Q4,M01219,  
 core = 0.95, similarity matrix = 0.85**  
 Stringency: **none specified**  
 Email address: **none specified**

**RUN**

Type of analysis: **visualization**  
 Reference organism: **Human (*Homo sapiens*)**  
 Transcript: **UBC chr12:125399587, number of introns: 1,  
 NM\_021009**  
 Sequence parts: **Intron 1,**  
 Transcription factors: **Sp1 TRANSFAC20113,V\$SP1\_Q2\_01,M00933  
 SP1:SP3 TRANSFAC20113,V\$SP1SP3\_Q4,M01219**  
 Stringency: **core = 0.95, similarity matrix = 0.85**  
 Email address: **none specified**

---

The job has been submitted in Contra v3 queue.  
 It is scheduled to be executed soon.  
 As soon as the results will be available you will be redirected to the results page.

Job ID **c6e18d90ecba6f837087b65a8aa36b25**  
 Submitted on **Wednesday 2017-04-05 09:17:48**  
 Elapsed time 0 hours 0 minutes 15 seconds

You can bookmark (CTRL + D) this page and return later:  
<http://bioit2.irc.ugent.be/contra/v3/#/results/c6e18d90ecba6f837087b65a8aa36b25>

**Results:** The results page consists of several sections indicated by a navigation menu on the right. The first sections shows the input parameters and a re-run option shown on the left below. For each TF an info button is available which can show the sequence logo (shown on the right below) representing the position weight matrix (PWM) for the detected binding site.

Type of analysis: **visualization**  
 Reference organism: **Human (*Homo sapiens*)**  
 Transcript: **UBC chr12:125399587, number of introns: 1,  
 NM\_021009**  
 Sequence parts: **Intron 1,**  
 Transcription factors: **Sp1 TRANSFAC20113,V\$SP1\_Q2\_01,M00933  
 SP1:SP3  
 TRANSFAC20113,V\$SP1SP3\_Q4,M01219**  
 Stringency: **core = 0.95, similarity matrix = 0.85**  
 Email address: **none specified**

**RE-RUN**

**Menu**  
**Parameters**  
 Overview  
 Sequences  
 Block 1  
 Block 2  
 Block 3  
 Block 4

Sp1 TRANSFAC20113,V\$SP1\_Q2\_01,M00933

Next in the overview section both a graphical overview and sequence alignment overview is shown. Several conserved transcription factor binding sites (TFBS) have been identified in this example and most of them can easily be spotted in the graphical overview in the figure below.

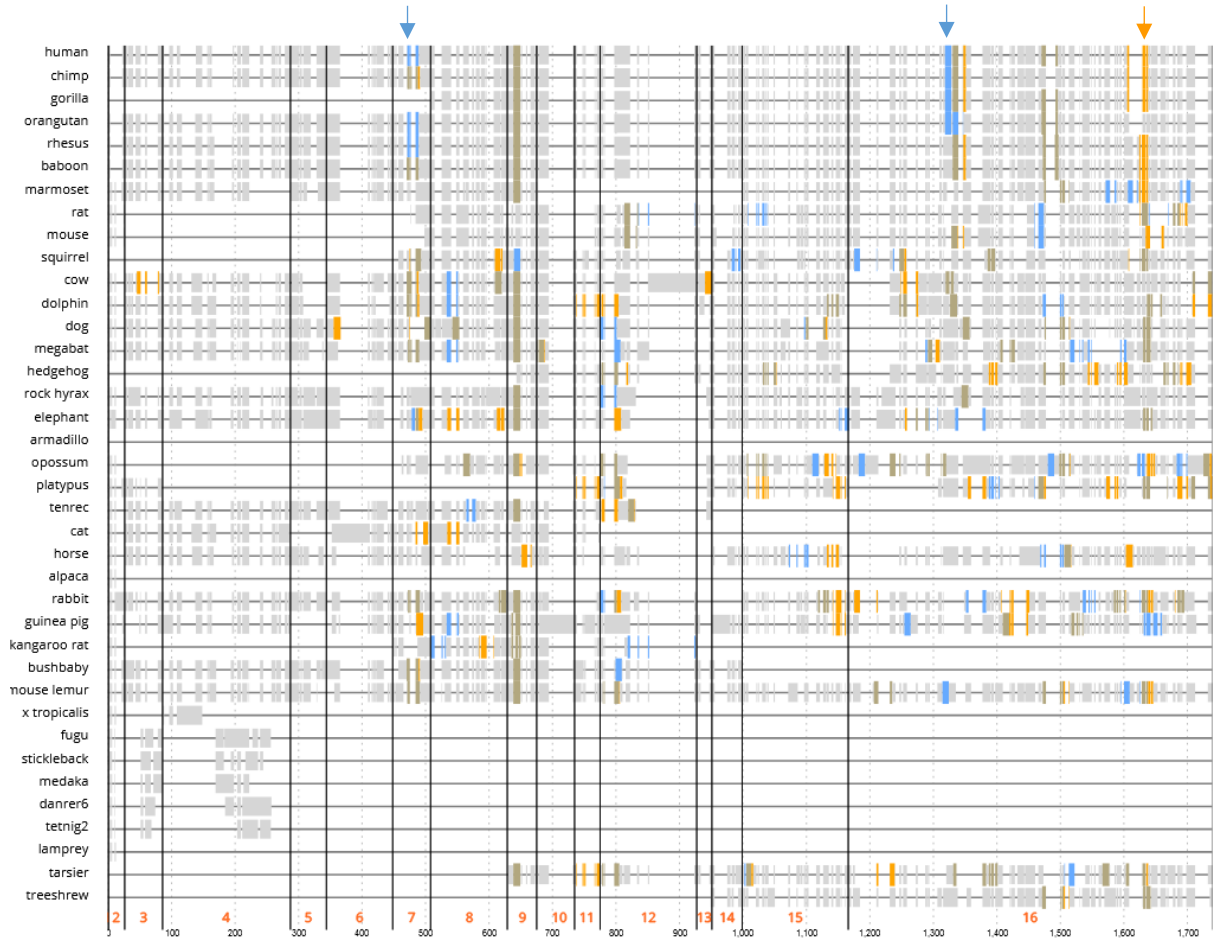

In this example we selected two similar PWMs (Sp1 and Sp1:Sp3). When multiple sites are predicted on the same sequence ConTra mixes colors. However because we have analyzed a large region in this example overlapping conserved sites might not be that obvious in the graphical overview but can be easily seen in the detailed multiz alignment blocks in the third results section. Alignment block nr. 8 shown below illustrates a highly conserved Sp1/Sp3 site.

A fasta and feature color (.fc) file for each alignment block can be downloaded to generate high quality figures with Jalview (explained on the help page of ConTra v3). The TFBS scores can also be downloaded as a tab separated summary table. For each species the detected TFBS (matrix), position in the alignment block, strand, scores and sequence hit are shown.

Alignment block nr: 8

Position:  
chr12:125398640-125398673

Links:

- [Results link](#)
- [UCSC link \(Human only\)](#)
- [UCSC link \(all species\)](#)

Downloads:

- [.FC file](#)
- [Fasta file](#)
- [TFBS scores](#)

| Species   | Matrix       | Position | Strand | Core_Score | Matrix_Score | Seq         |
|-----------|--------------|----------|--------|------------|--------------|-------------|
| Human     | V\$SP1_Q2_01 | 10       | (+)    | 0.966      | 0.945        | ccCCACCctg  |
| Chimp     | V\$SP1_Q2_01 | 10       | (+)    | 0.966      | 0.945        | ccCCACCctg  |
| Gorilla   | V\$SP1_Q2_01 | 10       | (+)    | 0.966      | 0.945        | ccCCACCctg  |
| orangutan | V\$SP1_Q2_01 | 10       | (+)    | 0.966      | 0.942        | ccCCACCcta  |
| Rhesus    | V\$SP1_Q2_01 | 10       | (+)    | 0.966      | 0.966        | ccCCACCcca  |
| Baboon    | V\$SP1_Q2_01 | 10       | (+)    | 0.966      | 0.942        | ccCCACCcta  |
| Marmoset  | V\$SP1_Q2_01 | 10       | (+)    | 1.000      | 0.993        | ccCCGCCcgg  |
| tarsier   | V\$SP1_Q2_01 | 2        | (-)    | 1.000      | 0.905        | gggGGCGGcc  |
| tarsier   | V\$SP1_Q2_01 | 10       | (+)    | 1.000      | 0.969        | ccCCGCCctg  |
| Mouse     | V\$SP1_Q2_01 | 10       | (+)    | 0.966      | 0.945        | ccCCACCctg  |
| Bushbaby  | V\$SP1_Q2_01 | 10       | (+)    | 0.966      | 0.966        | ccCCACCcca  |
| Guinea    | V\$SP1_Q2_01 | 7        | (+)    | 0.966      | 0.952        | ccCCACCctc  |
| squirrel  | V\$SP1_Q2_01 | 10       | (+)    | 0.966      | 0.930        | tcCCACCcgg  |
| Kangaroo  | V\$SP1_Q2_01 | 7        | (+)    | 1.000      | 0.938        | cgCCGCCcgg  |
| Rabbit    | V\$SP1_Q2_01 | 10       | (+)    | 1.000      | 0.969        | ccCCGCCctg  |
| Megabat   | V\$SP1_Q2_01 | 10       | (+)    | 0.966      | 0.945        | ccCCACCctg  |
| Dog       | V\$SP1_Q2_01 | 10       | (+)    | 0.966      | 0.969        | ccCCACCcgg  |
| Cow       | V\$SP1_Q2_01 | 10       | (+)    | 0.966      | 0.942        | ccCCACCcta  |
| Dolphin   | V\$SP1_Q2_01 | 10       | (+)    | 0.966      | 0.952        | ccCCACCctc  |
| Elephant  | V\$SP1_Q2_01 | 10       | (+)    | 0.966      | 0.966        | ccCCACCcca  |
| rock      | V\$SP1_Q2_01 | 10       | (+)    | 0.966      | 0.966        | ccCCACCcca  |
| Tenrec    | V\$SP1_Q2_01 | 10       | (+)    | 0.966      | 0.966        | ccCCACCcca  |
| Opossum   | V\$SP1_Q2_01 | 9        | (+)    | 0.966      | 0.935        | gcCCACCccc  |
| Human     | V\$SP1SP3_Q4 | 9        | (+)    | 0.971      | 0.903        | gccCCACCctg |
| Chimp     | V\$SP1SP3_Q4 | 9        | (+)    | 0.971      | 0.903        | gccCCACCctg |
| Gorilla   | V\$SP1SP3_Q4 | 9        | (+)    | 0.971      | 0.903        | gccCCACCctg |

In the display options of the graphical overview visualization of species and transcription factor binding sites can be switched off and on again.

Display options ✕

Show sequences    ALL    NONE                      Show factors    ALL    NONE

|                                                                                                                                                                                                                                                                                                                                                                                                                                                                                                                                                                                                                                                                                                                                                                                                                                                                                                                                                             |                                                                                                                                                                                                                                                                                                                                                                                                                                                                                                                                                                                                                                                                                                                                                                                                                                                                                                                                                                        |
|-------------------------------------------------------------------------------------------------------------------------------------------------------------------------------------------------------------------------------------------------------------------------------------------------------------------------------------------------------------------------------------------------------------------------------------------------------------------------------------------------------------------------------------------------------------------------------------------------------------------------------------------------------------------------------------------------------------------------------------------------------------------------------------------------------------------------------------------------------------------------------------------------------------------------------------------------------------|------------------------------------------------------------------------------------------------------------------------------------------------------------------------------------------------------------------------------------------------------------------------------------------------------------------------------------------------------------------------------------------------------------------------------------------------------------------------------------------------------------------------------------------------------------------------------------------------------------------------------------------------------------------------------------------------------------------------------------------------------------------------------------------------------------------------------------------------------------------------------------------------------------------------------------------------------------------------|
| <ul style="list-style-type: none"> <li><input checked="" type="checkbox"/> human</li> <li><input checked="" type="checkbox"/> gorilla</li> <li><input checked="" type="checkbox"/> rhesus</li> <li><input checked="" type="checkbox"/> marmoset</li> <li><input checked="" type="checkbox"/> mouse</li> <li><input type="checkbox"/> cow</li> <li><input type="checkbox"/> dog</li> <li><input type="checkbox"/> hedgehog</li> <li><input type="checkbox"/> elephant</li> <li><input type="checkbox"/> opossum</li> <li><input type="checkbox"/> pika</li> <li><input type="checkbox"/> sloth</li> <li><input type="checkbox"/> tenrec</li> <li><input type="checkbox"/> rabbit</li> <li><input type="checkbox"/> kangaroo rat</li> <li><input type="checkbox"/> mouse lemur</li> <li><input type="checkbox"/> fugu</li> <li><input type="checkbox"/> medaka</li> <li><input type="checkbox"/> tetnig2</li> <li><input type="checkbox"/> tarsier</li> </ul> | <ul style="list-style-type: none"> <li><input checked="" type="checkbox"/> chimp</li> <li><input checked="" type="checkbox"/> orangutan</li> <li><input checked="" type="checkbox"/> baboon</li> <li><input checked="" type="checkbox"/> rat</li> <li><input type="checkbox"/> squirrel</li> <li><input type="checkbox"/> dolphin</li> <li><input type="checkbox"/> megabat</li> <li><input type="checkbox"/> rock hyrax</li> <li><input type="checkbox"/> armadillo</li> <li><input type="checkbox"/> platypus</li> <li><input type="checkbox"/> alpaca</li> <li><input type="checkbox"/> cat</li> <li><input type="checkbox"/> horse</li> <li><input type="checkbox"/> guinea pig</li> <li><input type="checkbox"/> bushbaby</li> <li><input type="checkbox"/> x tropicalis</li> <li><input type="checkbox"/> stickleback</li> <li><input type="checkbox"/> danrer6</li> <li><input type="checkbox"/> lamprey</li> <li><input type="checkbox"/> treeshrew</li> </ul> |
|-------------------------------------------------------------------------------------------------------------------------------------------------------------------------------------------------------------------------------------------------------------------------------------------------------------------------------------------------------------------------------------------------------------------------------------------------------------------------------------------------------------------------------------------------------------------------------------------------------------------------------------------------------------------------------------------------------------------------------------------------------------------------------------------------------------------------------------------------------------------------------------------------------------------------------------------------------------|------------------------------------------------------------------------------------------------------------------------------------------------------------------------------------------------------------------------------------------------------------------------------------------------------------------------------------------------------------------------------------------------------------------------------------------------------------------------------------------------------------------------------------------------------------------------------------------------------------------------------------------------------------------------------------------------------------------------------------------------------------------------------------------------------------------------------------------------------------------------------------------------------------------------------------------------------------------------|

  

|                                                                                                                                                               |
|---------------------------------------------------------------------------------------------------------------------------------------------------------------|
| <ul style="list-style-type: none"> <li><input checked="" type="checkbox"/> Sp1 V\$SP1_Q2_01</li> <li><input type="checkbox"/> SP1:SP3 V\$SP1SP3_Q4</li> </ul> |
|---------------------------------------------------------------------------------------------------------------------------------------------------------------|

↑  
DISPLAY OPTIONS      RESET ZOOM

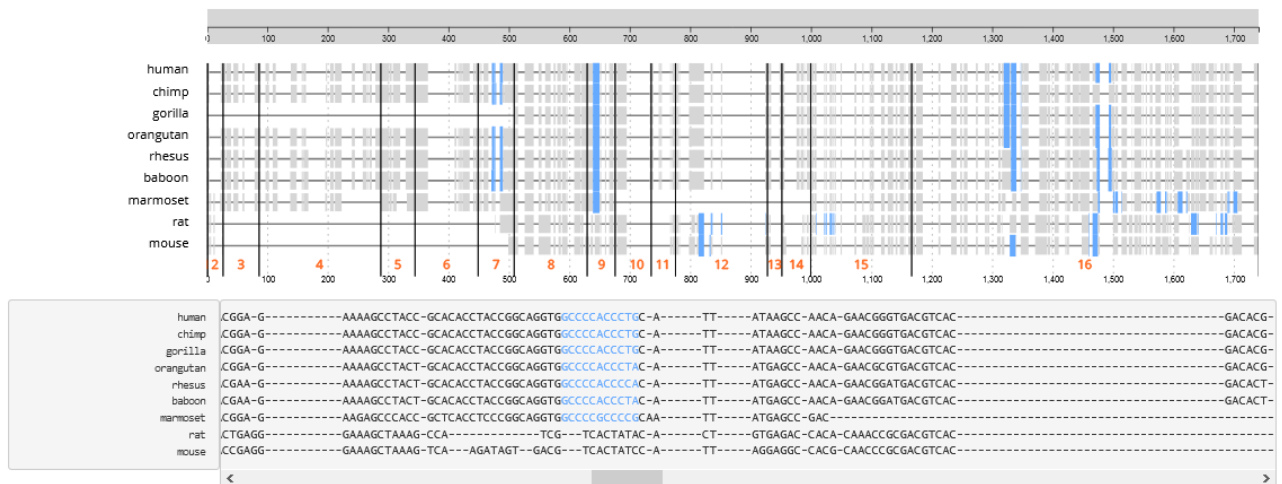

Supplement: gkx376_Supp.pdf [file gkx376_Supp.pdf]
